# Supplementary material for: Confining calcium oxalate crystal growth in a carbonated apatite-coated microfluidic channel to better understand the role of Randall's plaque in kidney stone formation
Source: Royal Society of Chemistry journal article supplement (doi:10.1039/d3lc01050c), 2024-01-01
Supplement: d3lc01050c1.pdf [file d3lc01050c1.pdf]

## Electronic Supplementary Information

### Confining calcium oxalate crystal's growth in carbonated apatite-coated microfluidic channel to better understand the role of Randall's plaque in kidney stone formation

Samantha Bourg,<sup>a</sup> Karol Rakotozandriny,<sup>a,b</sup> Ivan T. Lucas,<sup>c</sup> Emmanuel Letavernier,<sup>d</sup> Christian Bonhomme,<sup>b</sup> Florence Babonneau,<sup>b</sup> and Ali Abou-Hassan<sup>\*a,e</sup>

[Ali.abou\\_hassan@sorbonne-universite.fr](mailto:Ali.abou_hassan@sorbonne-universite.fr)

**Table 1:** Chemical composition in Na<sup>+</sup>, K<sup>+</sup>, Mg<sup>2+</sup>, Ca<sup>2+</sup>, Cl<sup>-</sup>, HCO<sub>3</sub><sup>-</sup>, HPO<sub>4</sub><sup>2-</sup> and SO<sub>4</sub><sup>2-</sup> ions of 1.5 SBF solution buffered at pH 7.4 with 10 mM Tris-HCl.

| Ions                        | Na <sup>+</sup> | K <sup>+</sup> | Mg <sup>2+</sup> | Ca <sup>2+</sup> | Cl <sup>-</sup> | HCO <sub>3</sub> <sup>-</sup> | HPO <sub>4</sub> <sup>2-</sup> | SO <sub>4</sub> <sup>2-</sup> |
|-----------------------------|-----------------|----------------|------------------|------------------|-----------------|-------------------------------|--------------------------------|-------------------------------|
| ion concentrations (mmol/L) | 213.0           | 7.5            | 2.3              | 3.8              | 221.7           | 6.3                           | 1.5                            | 0.8                           |

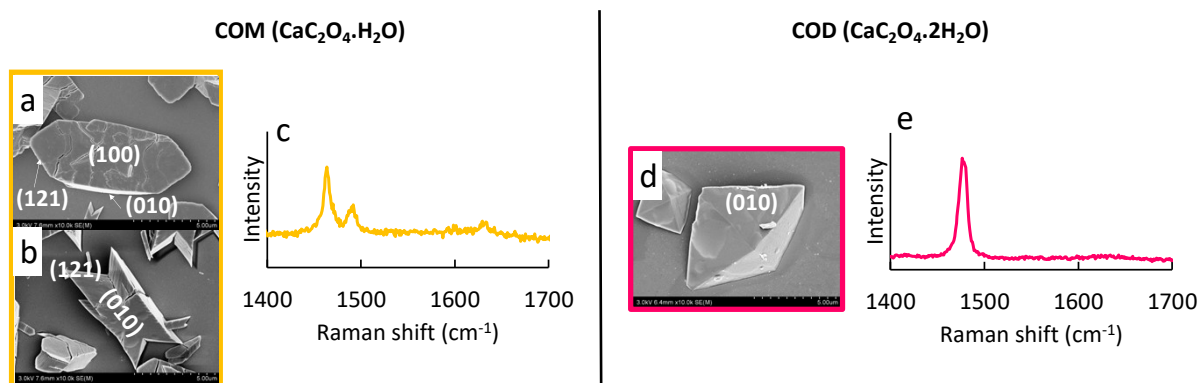

**Fig. S1:** a,b) SEM-FEG images of COM crystals and d) COD crystals with their respective Raman spectra

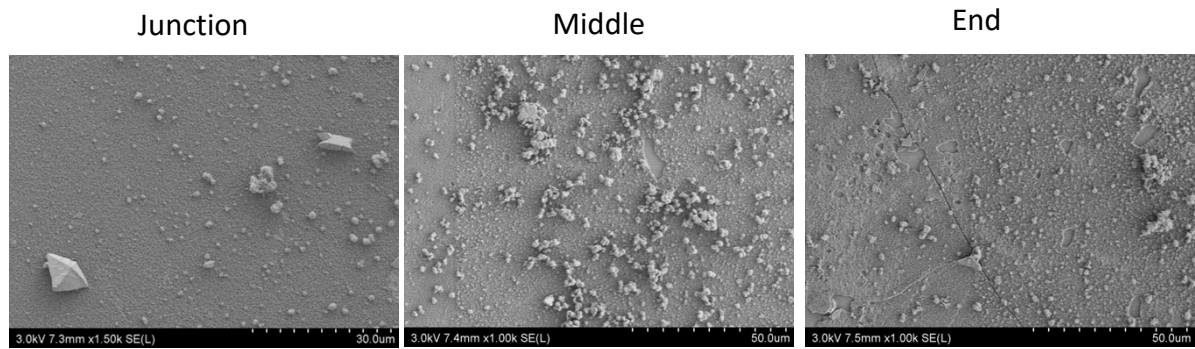

**Fig. S2:** SEM images of CHA coating at different positions in the channel after perfusion of oxalate and calcium solutions for 2h (SB)

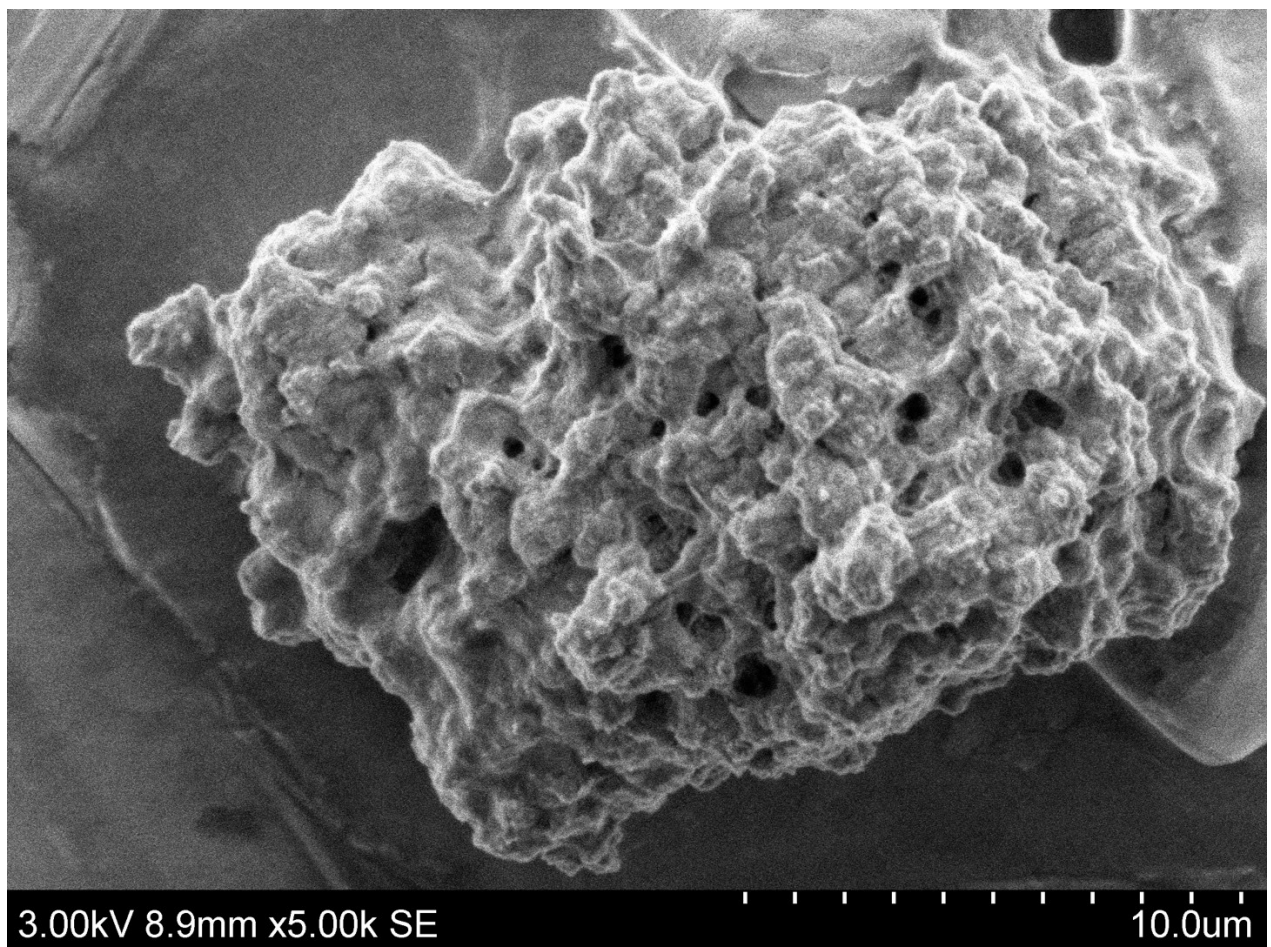

**Fig. S3:** SEM image showing the precipitate formed at the outlet of the microchannel after perfusion of oxalate and calcium solutions for 2h (SB)

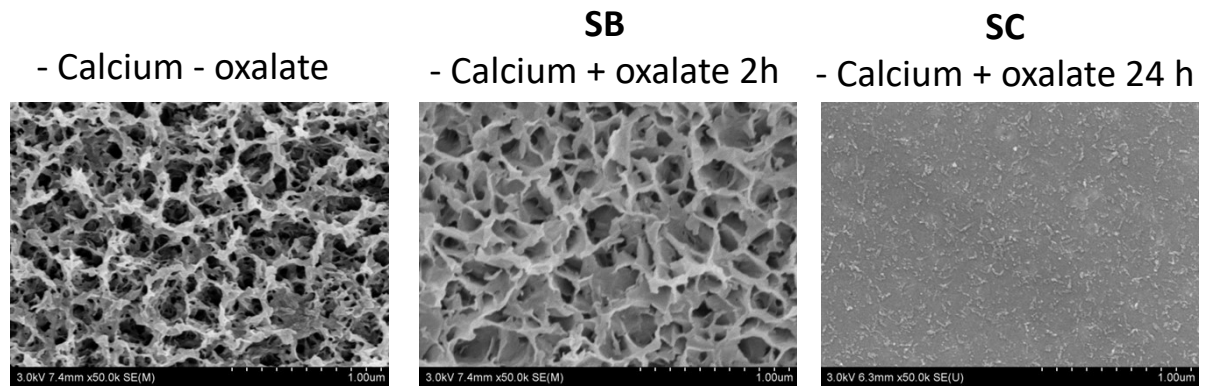

**Fig. S4:** SEM-FEG images of the initial CHA substrate and at the end of the experiment for SB and SC

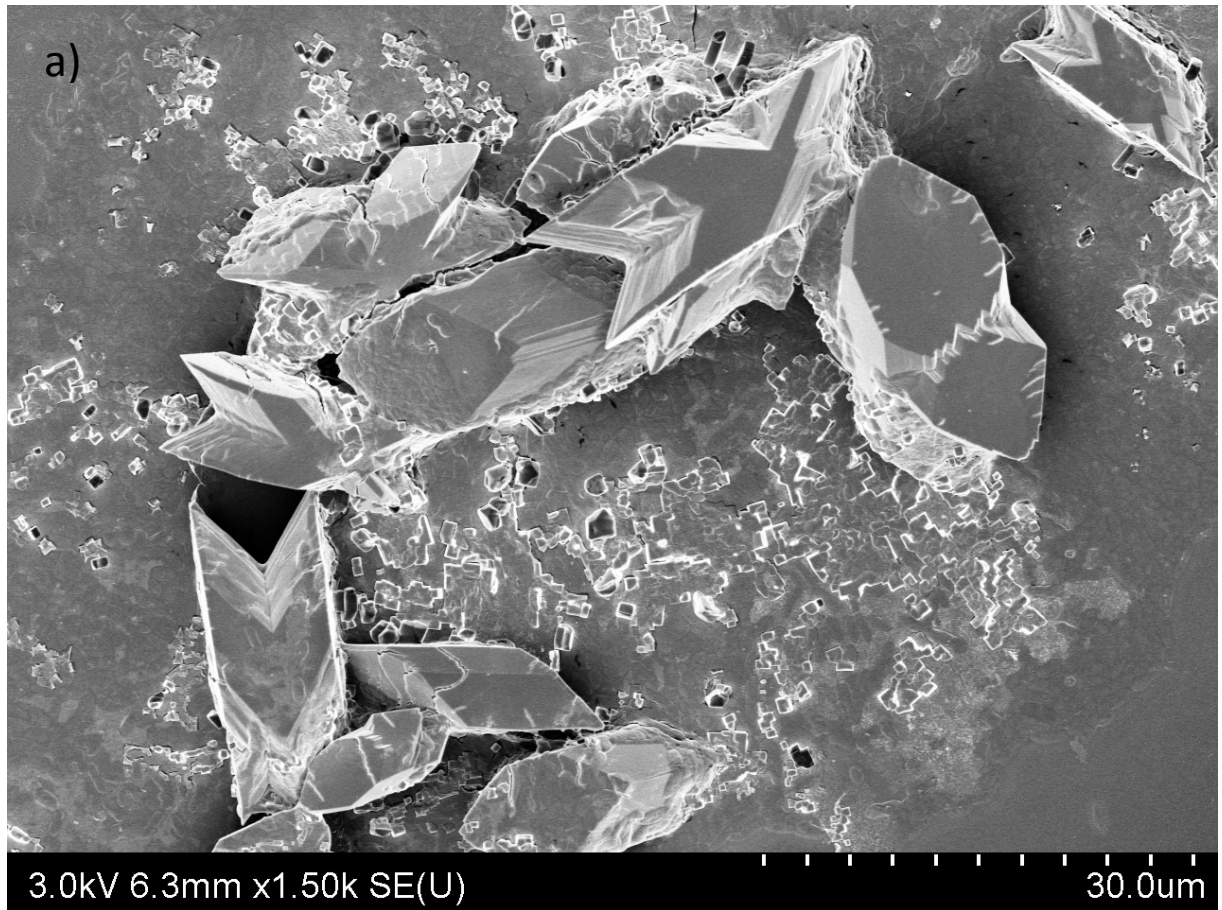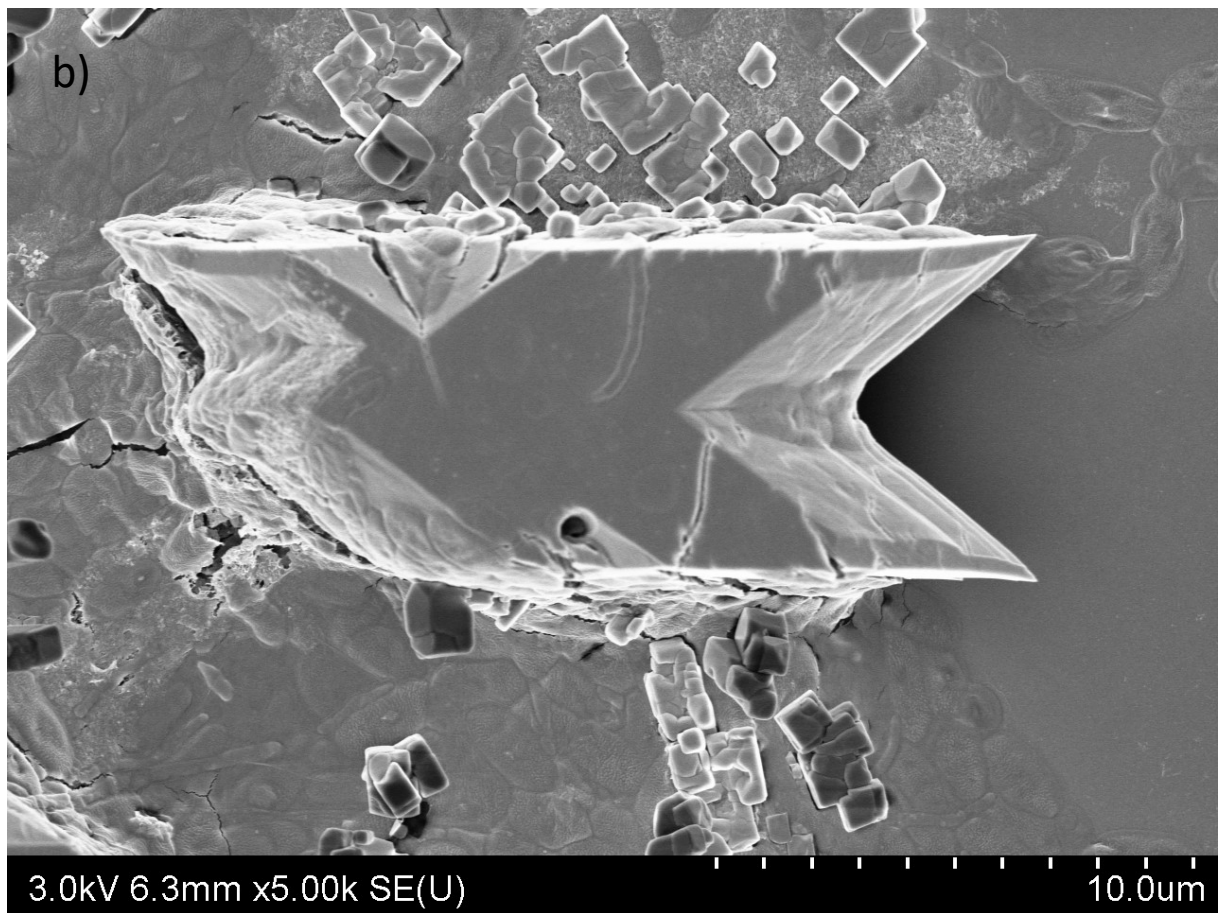

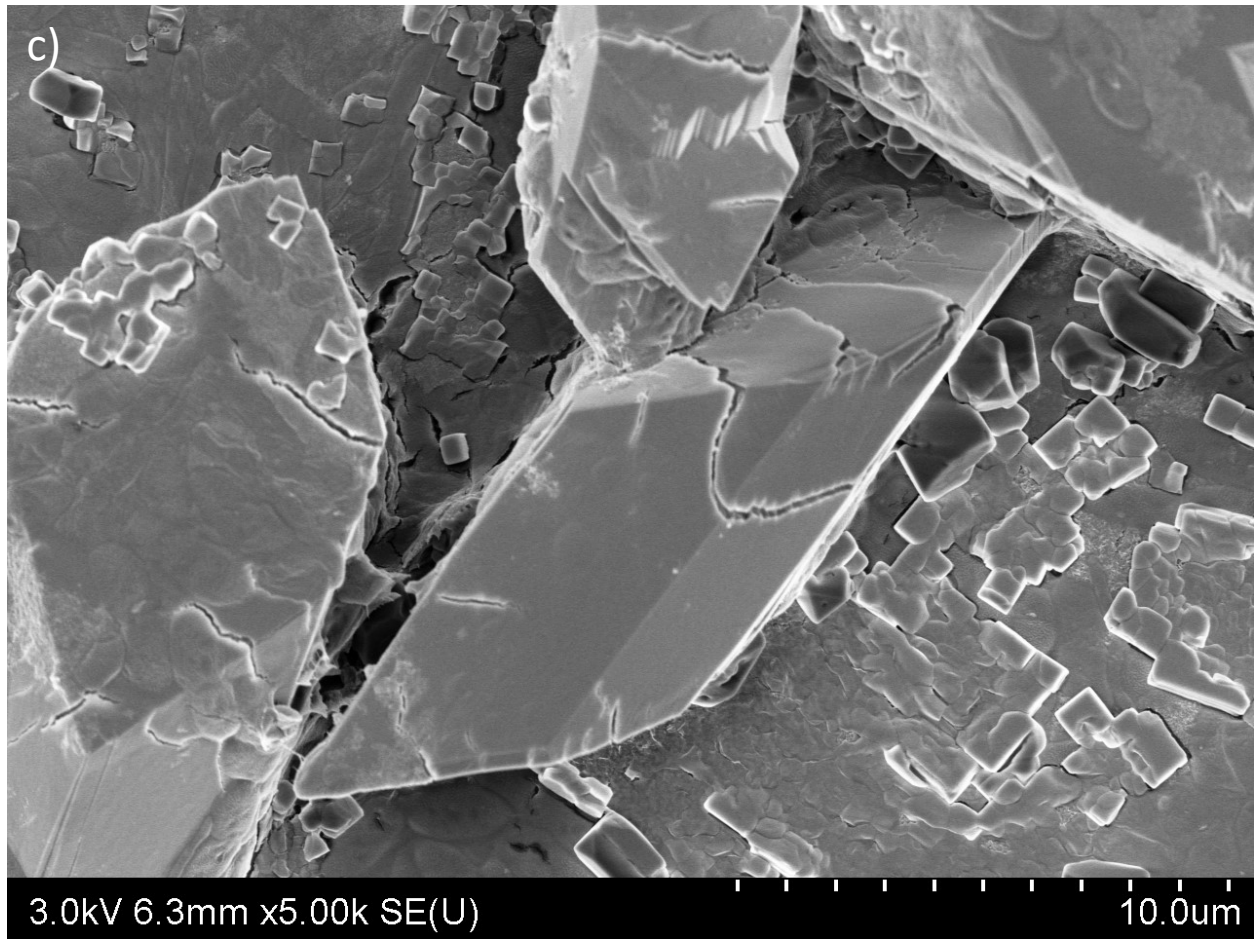

**Fig. S5:** a-c) Crystallization of CaOx in the microchannel after infusion of calcium and oxalate solutions on CHA for 2h (SB)

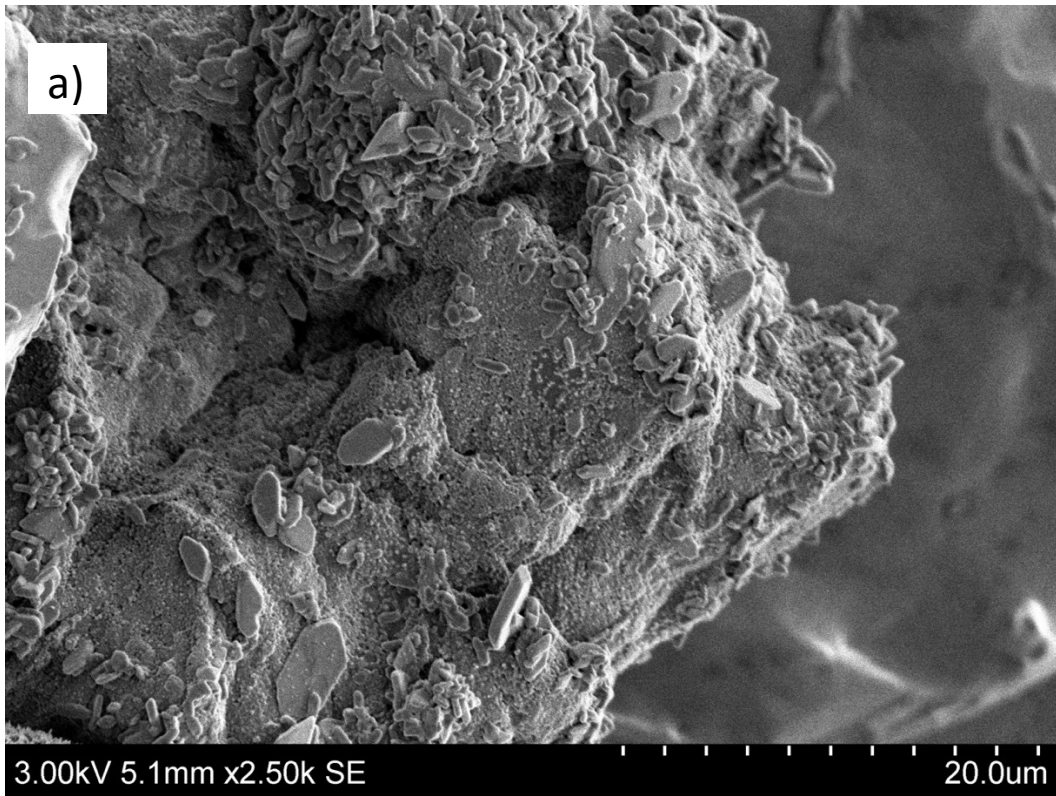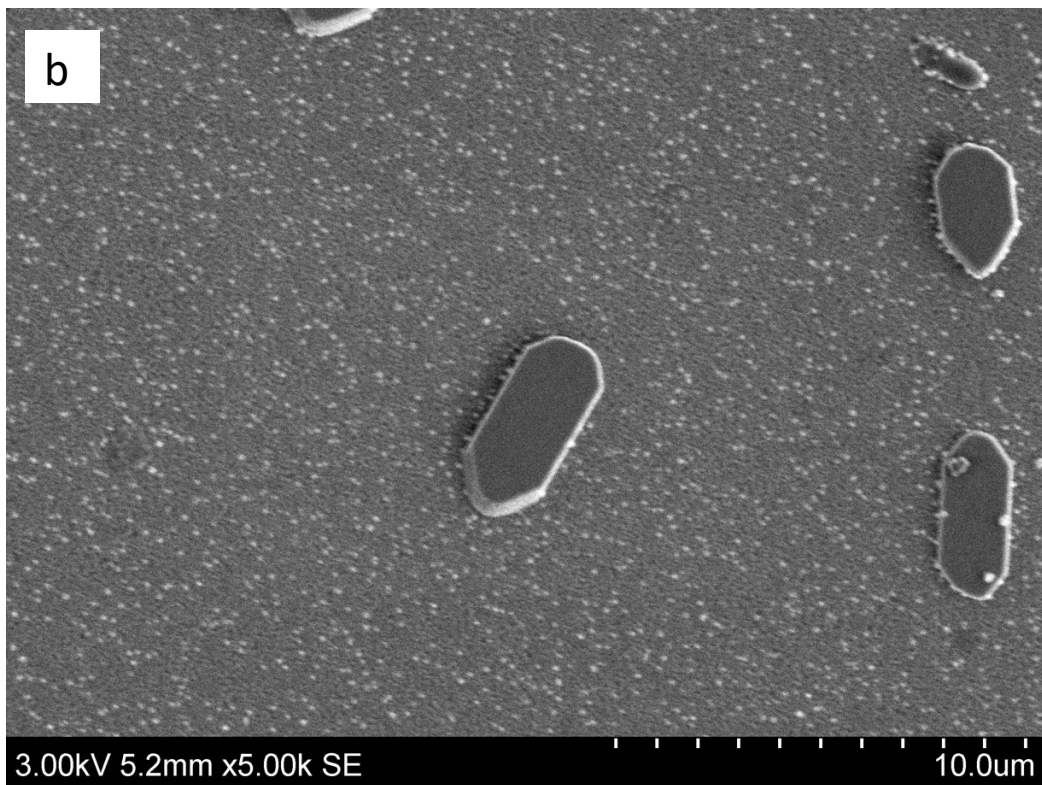

**Fig. S6:** a,b) Crystallization of CaOx at the outlet of the microchannel after infusion of oxalate solutions on CHA for 24h (SC)
